# Supplementary material for: Global, regional, and national burden of acute lymphoblastic leukemia in children: Epidemiological trends analysis from 1990 to 2021
Source: PubMed Central journal article supplement — iScience. 2024 Nov 23;27(12):111356. doi: 10.1016/j.isci.2024.111356 (PMC11664140; doi:10.1016/j.isci.2024.111356), 2024-11-23
Supplement: mmc1.pdf [file mmc1.pdf]

iScience, Volume 27

## **Supplemental information**

### **Global, regional, and national burden of acute lymphoblastic leukemia in children: Epidemiological trends analysis from 1990 to 2021**

**Yuyuan Hu, Yongping Liu, Jieting Fu, Yong Liu, Haiying Wang, and Ying Song**

**Figure S1: Trends in incidence, deaths, and DALYs of childhood ALL by gender and gender ratio across SDI regions (1990-2021), related to Figure 2**

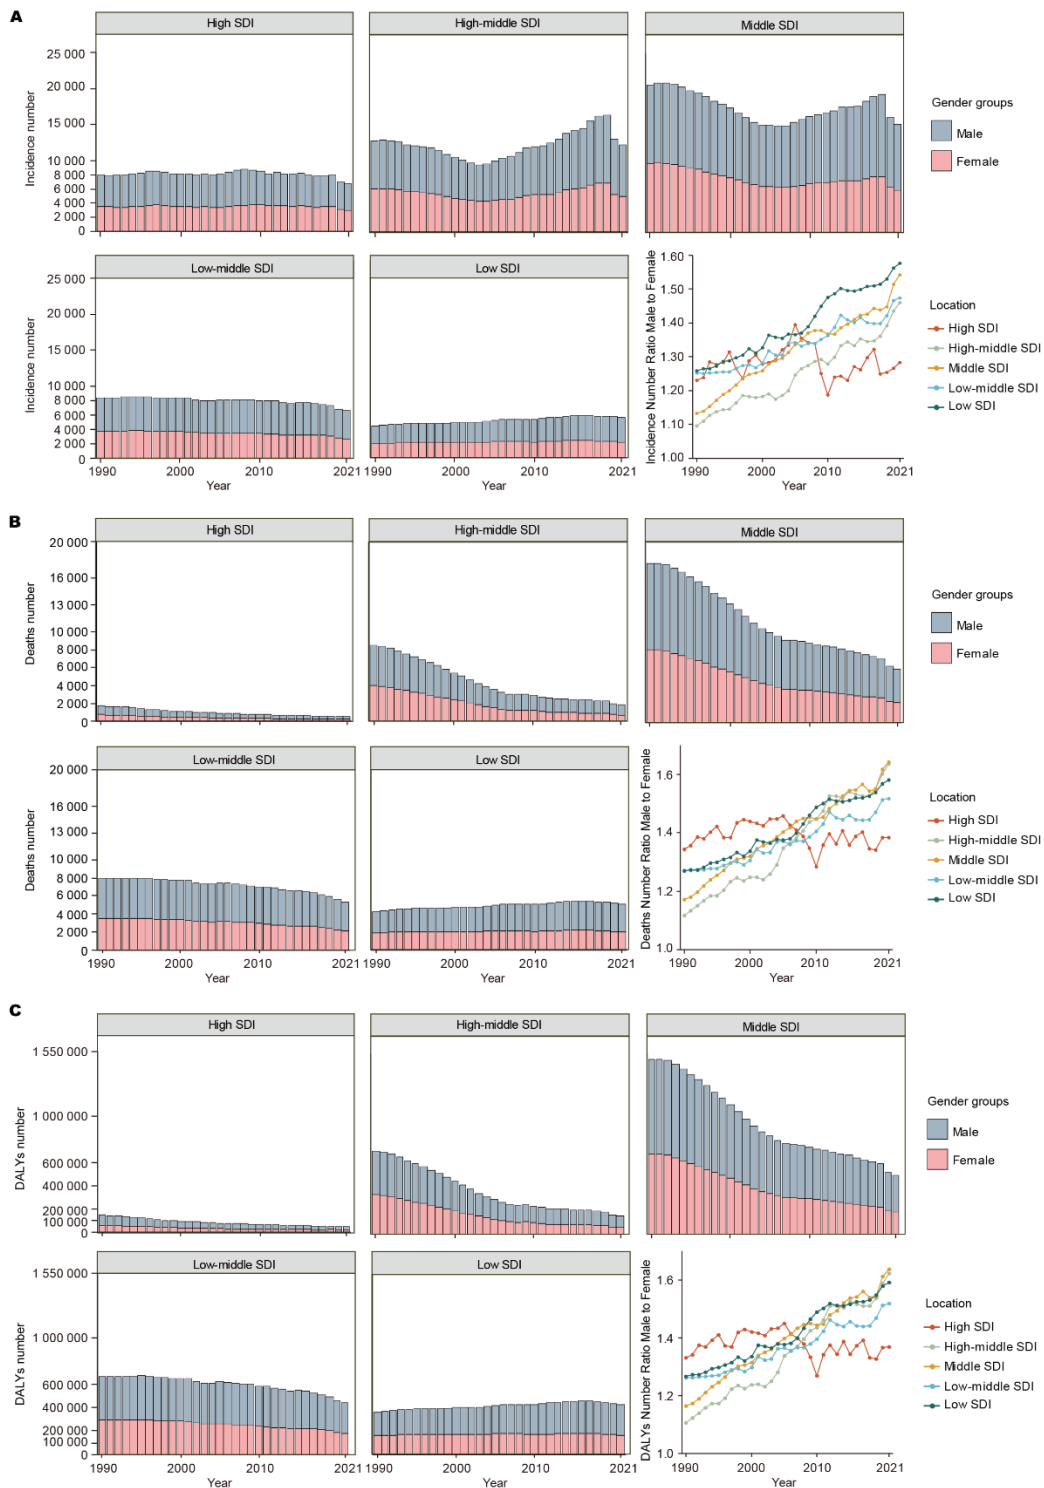

A: Trends in incidence number.

B: Trends in deaths number.

C: Trends in DALYs number.

DALYs: disability-adjusted life year; SDI: socio-demographic index.

**Figure S2: Incidence, deaths, and DALYs rates trends of childhood ALL in different age groups across SDI regions (1990-2021), related to Figure 2**

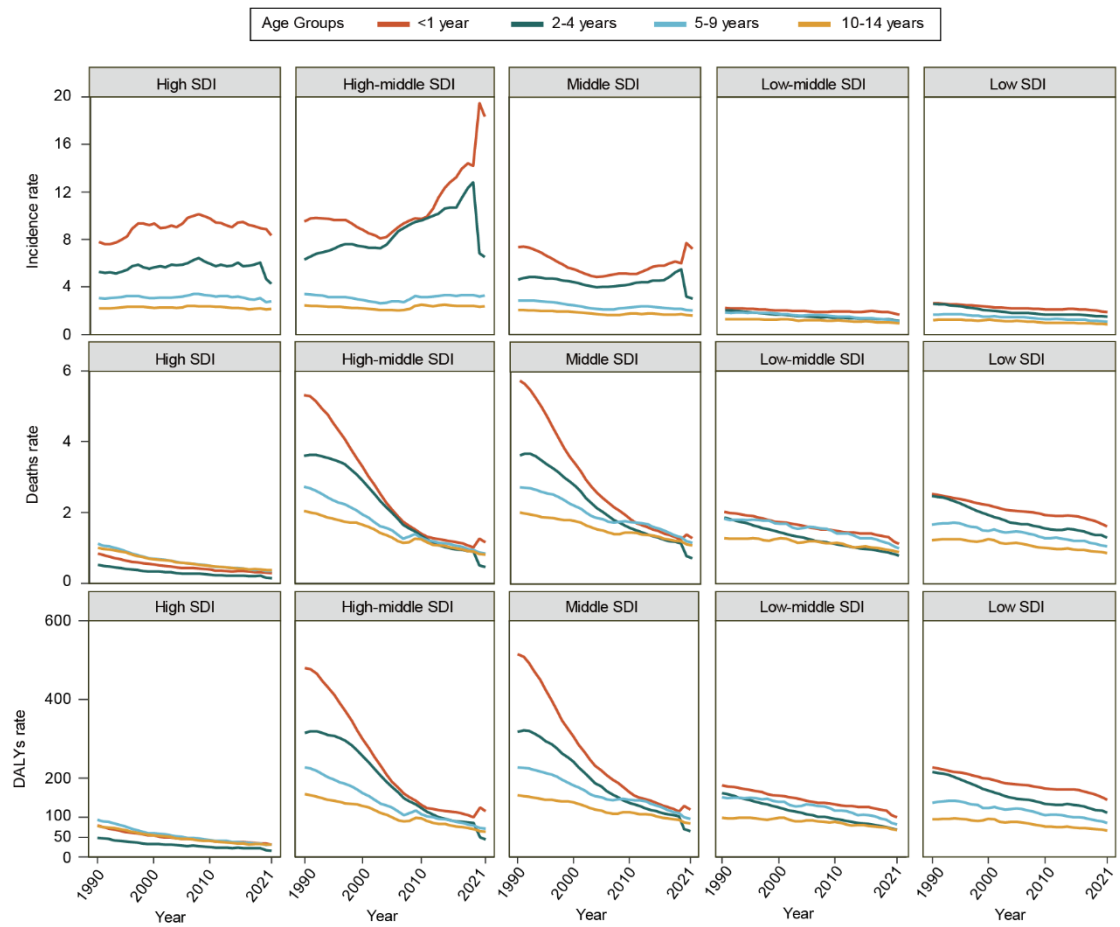

DALYs: disability-adjusted life year; SDI: socio-demographic index.

**Figure S3: Trends in incidence, deaths, and DALYs rates of ALL in children across 21 GBD regions (1990-2021), related to Figure 3**

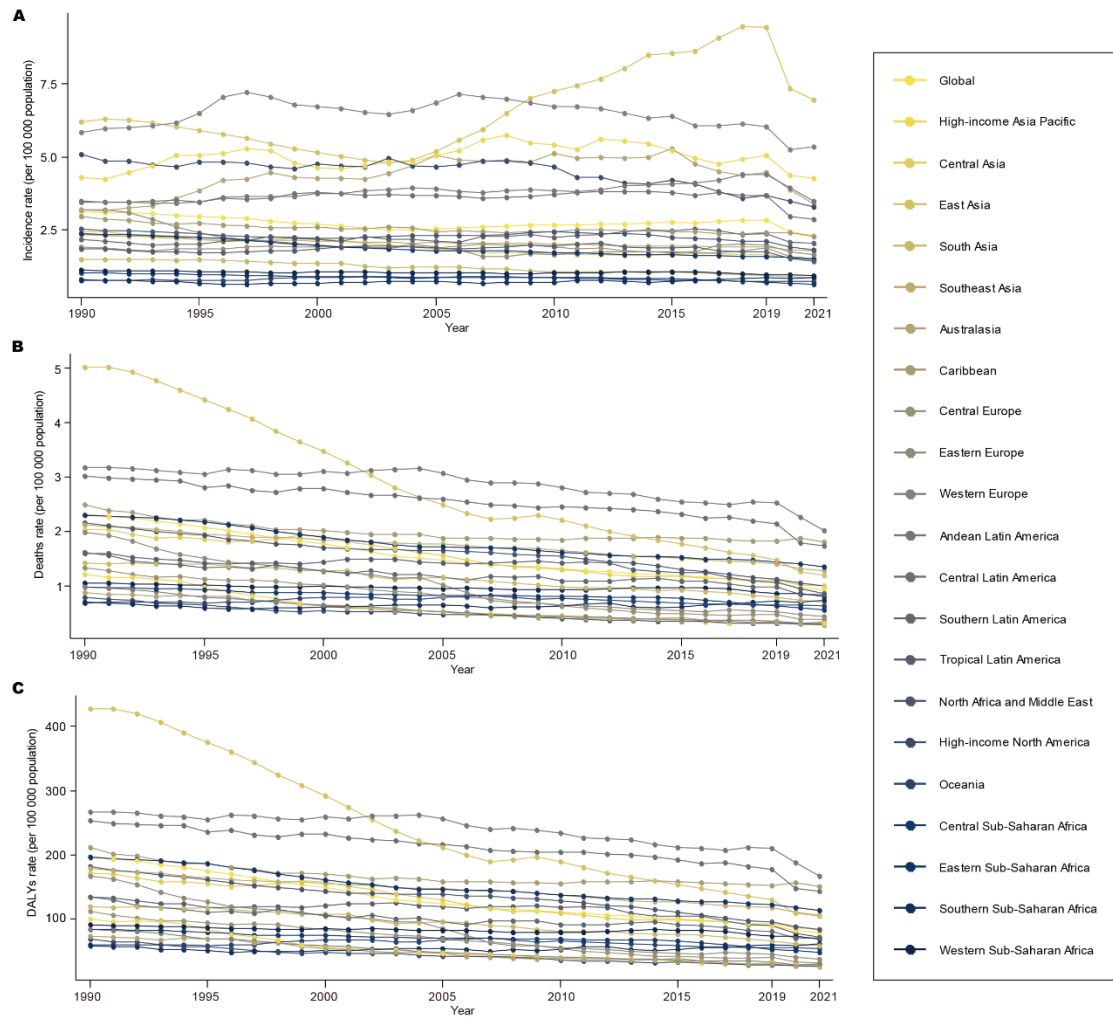

A: Trends in incidence rate.  
 B: Trends in deaths rate.  
 C: Trends in DALYs rate.  
 DALYs: disability-adjusted life year.

**Figure S4: Incidence, deaths, and DALYs rates of childhood ALL in 204 countries and territories in 2021, related to Figure 4**

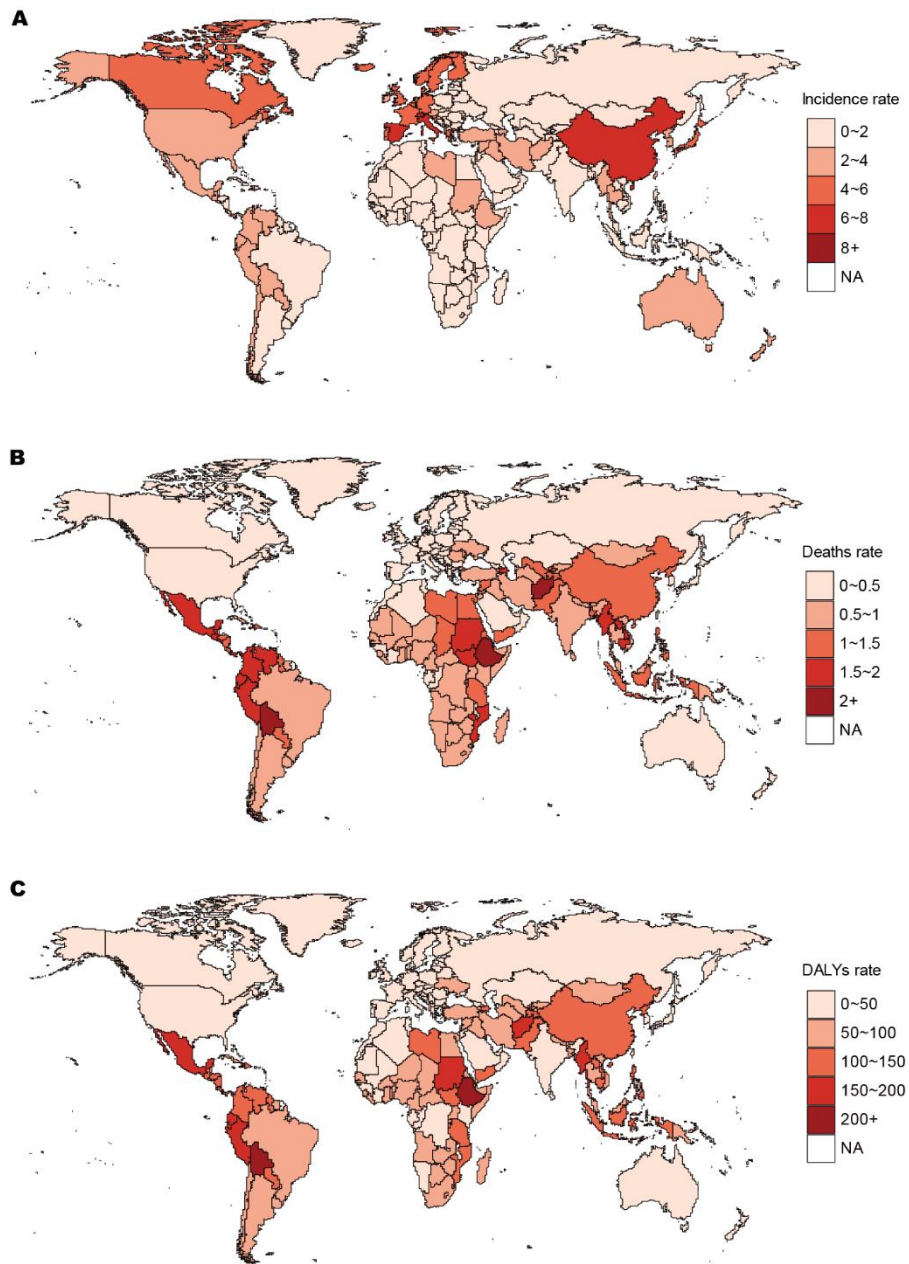

A: Trends in incidence rate.  
B: Trends in deaths rate.  
C: Trends in DALYs rate.  
DALYs: disability-adjusted life year.

**Figure S5: EAPC trends of childhood ALL in 204 countries and regions from 1990 to 2021, related to Figure 4**

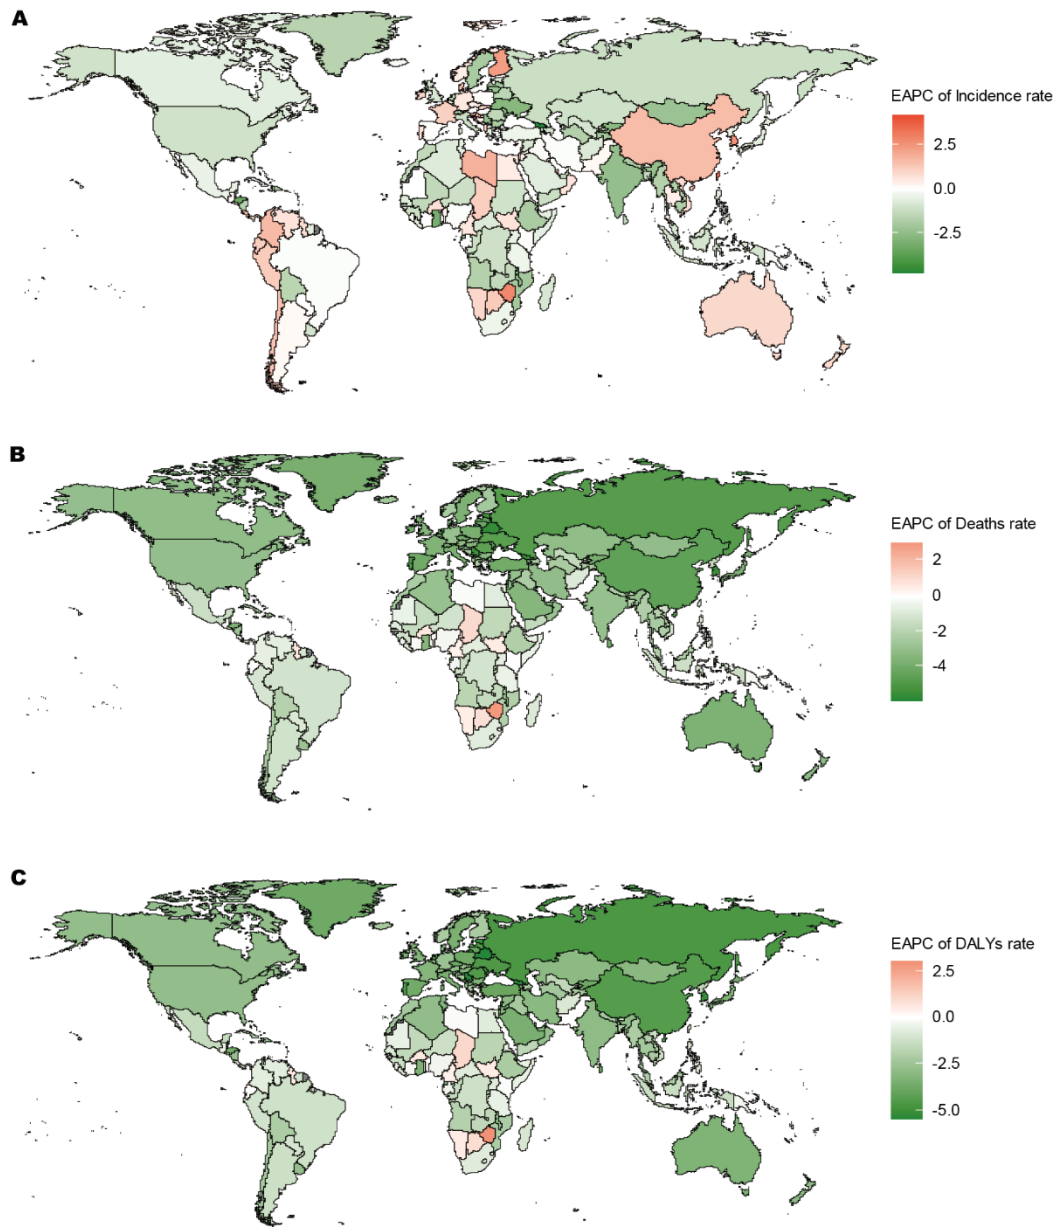

A: Trends in EAPC of incidence rate.

B: Trends in EAPC of deaths rate.

C: Trends in EAPC of DALYs rate.

DALYs: disability-adjusted life year; EAPC: estimated annual percentage changes.

**Figure S6: Correlation between SDI and incidence, deaths, and DALYs rates of childhood ALL in 204 countries and territories in 2021, related to Figure 5**

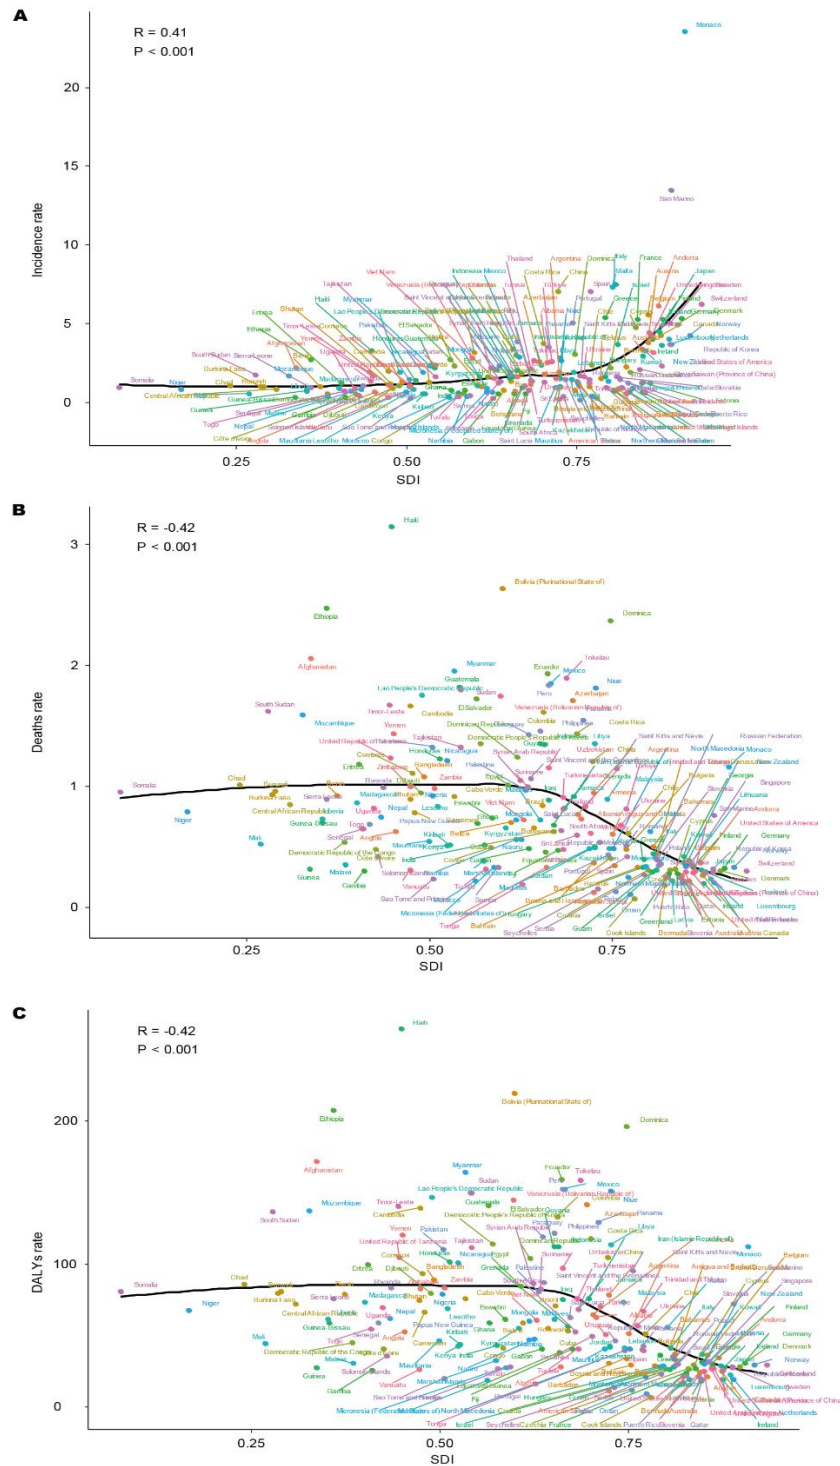

A: The correlation between SDI and incidence rate.  
 B: The correlation between SDI and deaths rate.  
 C: The correlation between SDI and DALYs rate.  
 DALYs: disability-adjusted life year; SDI: socio-demographic index.

**Table S1: Trends in DALYs at the global and SDI levels, 1990-2021, related to Figures 1 and 2 and Table 1**

| Characteristics | DALYs (95%UI)               |                          |                             |                        |                       |                       |
|-----------------|-----------------------------|--------------------------|-----------------------------|------------------------|-----------------------|-----------------------|
|                 | 1990                        |                          | 2021                        |                        | 1990-2021             |                       |
|                 | Number                      | Rate(per100000)          | Number                      | Rate(per100000)        | Number change         | EAPC (95%CI)          |
| Global          | 3400708(2509935 to 4699438) | 195.54(144.32 to 270.21) | 1586755(1108074 to 1935867) | 78.87(55.08 to 96.22)  | -0.53(-0.68 to -0.33) | -2.79(-2.89 to -2.69) |
| Genders         |                             |                          |                             |                        |                       |                       |
| Male            | 1845615(990664 to 2832341)  | 206.56(110.88 to 317)    | 971579(603477 to 1263734)   | 93.59(58.13 to 121.73) | -0.47(-0.67 to -0.02) | -2.43(-2.53 to -2.33) |
| Female          | 1555093(1014465 to 2235038) | 183.89(119.96 to 264.3)  | 615176(411164 to 749608)    | 63.18(42.23 to 76.99)  | -0.6(-0.75 to -0.39)  | -3.28(-3.38 to -3.17) |
| SDI quintiles   |                             |                          |                             |                        |                       |                       |
| High SDI        | 149614(141035 to 162247)    | 80.52(75.9 to 87.32)     | 50624(44673 to 56704)       | 29.34(25.89 to 32.87)  | -0.66(-0.71 to -0.62) | -3.13(-3.25 to -3.01) |
| High-middle SDI | 716514(533603 to 901662)    | 261.86(195.01 to 329.53) | 161071(106202 to 208425)    | 69.76(46 to 90.27)     | -0.78(-0.85 to -0.67) | -4.17(-4.32 to -4.03) |
| Middle SDI      | 1502663(1089235 to 2030500) | 260.33(188.71 to 351.78) | 505044(346718 to 625415)    | 89.09(61.16 to 110.33) | -0.66(-0.78 to -0.51) | -3.24(-3.38 to -3.1)  |
| Low-middle SDI  | 668414(417413 to 1055787)   | 141.58(88.41 to 223.63)  | 442393(318467 to 541772)    | 76.3(54.92 to 93.43)   | -0.34(-0.57 to 0.06)  | -1.79(-1.9 to -1.69)  |
| Low SDI         | 361298(180191 to 640206)    | 157.83(78.72 to 279.67)  | 426229(260952 to 563006)    | 92.61(56.7 to 122.33)  | 0.18(-0.31 to 1.38)   | -1.66(-1.72 to -1.6)  |

DALYs: disability-adjusted life year; EAPC: estimated annual percentage changes; SDI: socio-demographic index; CI: confidence interval; UI: uncertainty interval.



**Table S2: From 1990 to 2021, the incidence trends in 21 GBD regions, related to Figures 3 and 5**

| Regions                    | Incidence (95%UI)     |                     |                       |                     |                       |                       |
|----------------------------|-----------------------|---------------------|-----------------------|---------------------|-----------------------|-----------------------|
|                            | 1990                  |                     | 2021                  |                     | 1990-2021             |                       |
|                            | Number                | Rate<br>(per100000) | Number                | Rate<br>(per100000) | Number change         | EAPC (95%CI)          |
| Andean Latin America       | 511(396 to 723)       | 3.44(2.67 to 4.87)  | 632(391 to 871)       | 3.49(2.16 to 4.81)  | 0.24(-0.36 to 0.98)   | 0.59(0.42 to 0.75)    |
| Australasia                | 146(125 to 172)       | 3.19(2.72 to 3.75)  | 194(153 to 238)       | 3.38(2.67 to 4.15)  | 0.32(-0.01 to 0.73)   | 0.89(0.4 to 1.38)     |
| Caribbean                  | 338(237 to 500)       | 2.96(2.07 to 4.38)  | 260(178 to 388)       | 2.26(1.55 to 3.37)  | -0.23(-0.43 to 0.01)  | -0.59(-0.69 to -0.49) |
| Central Asia               | 604(509 to 713)       | 2.42(2.04 to 2.85)  | 412(334 to 534)       | 1.49(1.21 to 1.93)  | -0.32(-0.47 to -0.12) | -1.48(-1.63 to -1.33) |
| Central Europe             | 559(505 to 624)       | 1.9(1.71 to 2.12)   | 269(221 to 330)       | 1.52(1.25 to 1.86)  | -0.52(-0.62 to -0.38) | -0.34(-0.54 to -0.14) |
| Central Latin America      | 2228(2086 to 2407)    | 3.46(3.24 to 3.74)  | 1809(1492 to 2237)    | 2.85(2.35 to 3.52)  | -0.19(-0.34 to 0.01)  | -0.03(-0.27 to 0.22)  |
| Central Sub-Saharan Africa | 254(113 to 488)       | 1(0.45 to 1.93)     | 359(197 to 544)       | 0.61(0.34 to 0.93)  | 0.42(-0.17 to 2.3)    | -1.18(-1.36 to -0.99) |
| East Asia                  | 20439(14040 to 28574) | 6.2(4.26 to 8.66)   | 18557(10025 to 27603) | 6.94(3.75 to 10.32) | -0.09(-0.55 to 0.51)  | 1.56(0.98 to 2.14)    |
| Eastern Europe             | 1639(1471 to 1825)    | 3.18(2.86 to 3.55)  | 579(514 to 654)       | 1.63(1.45 to 1.85)  | -0.65(-0.7 to -0.59)  | -1.66(-2.14 to -1.18) |
| Eastern Sub-Saharan Africa | 2144(1080 to 3724)    | 2.37(1.19 to 4.11)  | 2648(1636 to 3839)    | 1.48(0.92 to 2.15)  | 0.23(-0.34 to 1.57)   | -1.47(-1.57 to -1.37) |

|                              |                     |                    |                    |                    |                      |                      |
|------------------------------|---------------------|--------------------|--------------------|--------------------|----------------------|----------------------|
| High-income Asia Pacific     | 1509(1293 to 1809)  | 4.29(3.67 to 5.14) | 958(790 to 1130)   | 4.27(3.52 to 5.04) | -0.36(-0.51 to 0.19) | 0.24(-0.08 to 0.55)  |
| High-income North America    | 3126(2951 to 3330)  | 5.07(4.78 to 5.4)  | 2155(1945 to 2397) | 3.28(2.96 to 3.65) | -0.31(-0.38 to 0.22) | -1(-1.24 to -0.76)   |
| North Africa and Middle East | 3543(2296 to 5310)  | 2.52(1.63 to 3.78) | 3330(1949 to 4318) | 1.82(1.06 to 2.36) | -0.06(-0.42 to 0.59) | -0.46(-0.66 to 0.25) |
| Oceania                      | 20(10 to 37)        | 0.75(0.37 to 1.39) | 36(18 to 67)       | 0.71(0.36 to 1.32) | 0.79(0.26 to 1.54)   | -0.15(-0.4 to 0.1)   |
| South Asia                   | 6373(3670 to 10311) | 1.47(0.85 to 2.38) | 4261(3028 to 5552) | 0.84(0.6 to 1.09)  | -0.33(-0.58 to 0.13) | -1.75(-1.86 to 1.64) |
| Southeast Asia               | 3958(2451 to 6337)  | 2.32(1.44 to 3.71) | 3050(2117 to 3779) | 1.77(1.23 to 2.19) | -0.23(-0.52 to 0.25) | -0.69(-0.74 to 0.63) |
| Southern Latin America       | 322(295 to 352)     | 2.16(1.97 to 2.36) | 294(244 to 354)    | 2.03(1.68 to 2.44) | -0.09(-0.26 to 0.15) | 0.44(0.23 to 0.65)   |
| Southern Sub-Saharan Africa  | 162(115 to 230)     | 0.78(0.56 to 1.11) | 207(146 to 264)    | 0.86(0.61 to 1.1)  | 0.28(-0.05 to 0.78)  | 0.49(0.22 to 0.76)   |
| Tropical Latin America       | 979(864 to 1090)    | 1.83(1.61 to 2.03) | 706(571 to 855)    | 1.41(1.14 to 1.7)  | -0.28(-0.42 to 0.11) | -0.1(-0.38 to 0.18)  |
| Western Europe               | 4152(3855 to 4492)  | 5.85(5.43 to 6.33) | 3648(3294 to 4084) | 5.36(4.84 to 6)    | -0.12(-0.23 to 0.01) | -0.23(-0.51 to 0.06) |
| Western Sub-Saharan Africa   | 971(480 to 1524)    | 1.11(0.55 to 1.73) | 1942(757 to 2825)  | 0.9(0.35 to 1.32)  | 1(0.15 to 2.39)      | -0.34(-0.45 to 0.23) |

EAPC: estimated annual percentage changes; CI: confidence interval; UI: uncertainty interval.

**Table S3: From 1990 to 2021, the deaths trends in 21 GBD regions, related to Figures 3 and 5**

| Regions                    | Deaths (95%UI)        |                     |                    |                     |                       |                       |
|----------------------------|-----------------------|---------------------|--------------------|---------------------|-----------------------|-----------------------|
|                            | 1990                  |                     | 2021               |                     | 1990-2021             |                       |
|                            | Number                | Rate<br>(per100000) | Number             | Rate<br>(per100000) | Number change         | EAPC (95%CI)          |
| Andean Latin America       | 472(364 to 678)       | 3.18(2.45 to 4.56)  | 366(240 to 486)    | 2.02(1.33 to 2.68)  | -0.23(-0.57 to 0.17)  | -1.06(-1.25 to -0.86) |
| Australasia                | 40(37 to 43)          | 0.88(0.81 to 0.95)  | 16(14 to 19)       | 0.28(0.24 to 0.33)  | -0.6(-0.66 to -0.52)  | -3.54(-3.73 to -3.35) |
| Caribbean                  | 285(187 to 445)       | 2.5(1.64 to 3.9)    | 207(130 to 341)    | 1.8(1.13 to 2.96)   | -0.27(-0.47 to 0.04)  | -0.83(-0.98 to -0.68) |
| Central Asia               | 510(435 to 594)       | 2.04(1.74 to 2.38)  | 277(225 to 351)    | 1(0.81 to 1.27)     | -0.46(-0.58 to -0.3)  | -2.39(-2.57 to -2.2)  |
| Central Europe             | 395(357 to 436)       | 1.34(1.21 to 1.48)  | 68(60 to 77)       | 0.39(0.34 to 0.43)  | -0.83(-0.85 to -0.79) | -3.95(-4.16 to -3.74) |
| Central Latin America      | 1948(1826 to 2091)    | 3.03(2.84 to 3.25)  | 1100(935 to 1308)  | 1.73(1.47 to 2.06)  | -0.44(-0.53 to -0.32) | -1.32(-1.5 to -1.13)  |
| Central Sub-Saharan Africa | 248(110 to 480)       | 0.98(0.43 to 1.9)   | 336(186 to 507)    | 0.57(0.32 to 0.86)  | 0.35(-0.21 to 2.23)   | -1.31(-1.5 to -1.11)  |
| East Asia                  | 16535(11347 to 22888) | 5.01(3.44 to 6.94)  | 3222(1905 to 4446) | 1.21(0.71 to 1.66)  | -0.81(-0.89 to -0.68) | -4.46(-4.64 to -4.28) |
| Eastern Europe             | 1021(935 to 1122)     | 1.98(1.82 to 2.18)  | 161(149 to 175)    | 0.45(0.42 to 0.49)  | -0.84(-0.86 to -0.82) | -4.84(-5.13 to -4.56) |
| Eastern Sub-Saharan Africa | 2089(1040 to 3639)    | 2.31(1.15 to 4.02)  | 2414(1510 to 3517) | 1.35(0.85 to 1.97)  | 0.16(-0.38 to 1.43)   | -1.67(-1.76 to -1.58) |

|                              |                     |                    |                    |                    |                       |                       |
|------------------------------|---------------------|--------------------|--------------------|--------------------|-----------------------|-----------------------|
| High-income Asia Pacific     | 426(359 to 494)     | 1.21(1.02 to 1.4)  | 72(63 to 80)       | 0.32(0.28 to 0.35) | -0.83(-0.86 to -0.79) | -4.42(-4.7 to -4.14)  |
| High-income North America    | 489(479 to 500)     | 0.79(0.78 to 0.81) | 196(184 to 211)    | 0.3(0.28 to 0.32)  | -0.6(-0.62 to -0.57)  | -2.96(-3.07 to -2.84) |
| North Africa and Middle East | 3048(1976 to 4584)  | 2.17(1.41 to 3.26) | 1848(1041 to 2404) | 1.01(0.57 to 1.31) | -0.39(-0.63 to -0.01) | -2.07(-2.24 to -1.89) |
| Oceania                      | 19(9 to 34)         | 0.7(0.34 to 1.29)  | 32(17 to 60)       | 0.64(0.33 to 1.18) | 0.73(0.18 to 1.5)     | -0.23(-0.48 to 0.03)  |
| South Asia                   | 6167(3565 to 10085) | 1.42(0.82 to 2.33) | 3620(2624 to 4687) | 0.71(0.52 to 0.92) | -0.41(-0.62 to -0.01) | -2.15(-2.29 to -2.01) |
| Southeast Asia               | 3635(2247 to 5883)  | 2.13(1.32 to 3.45) | 2212(1512 to 2729) | 1.28(0.88 to 1.58) | -0.39(-0.62 to -0.01) | -1.43(-1.51 to -1.34) |
| Southern Latin America       | 242(224 to 264)     | 1.62(1.5 to 1.77)  | 123(108 to 143)    | 0.85(0.74 to 0.99) | -0.49(-0.57 to -0.39) | -1.53(-1.71 to -1.35) |
| Southern Sub-Saharan Africa  | 146(105 to 206)     | 0.7(0.51 to 0.99)  | 178(126 to 227)    | 0.74(0.52 to 0.94) | 0.22(-0.08 to 0.68)   | 0.27(0.05 to 0.48)    |
| Tropical Latin America       | 858(755 to 957)     | 1.6(1.41 to 1.78)  | 438(359 to 518)    | 0.87(0.71 to 1.03) | -0.49(-0.58 to -0.39) | -1.19(-1.51 to -0.87) |
| Western Europe               | 699(677 to 719)     | 0.98(0.95 to 1.01) | 227(210 to 244)    | 0.33(0.31 to 0.36) | -0.68(-0.7 to -0.65)  | -3.55(-3.68 to -3.42) |
| Western Sub-Saharan Africa   | 935(464 to 1478)    | 1.06(0.53 to 1.68) | 1758(701 to 2512)  | 0.82(0.33 to 1.17) | 0.88(0.1 to 2.15)     | -0.53(-0.64 to -0.42) |

EAPC: estimated annual percentage changes; CI: confidence interval; UI: uncertainty interval.

**Table S4: From 1990 to 2021, the DALYs trends in 21 GBD regions, related to Figures 3 and 5**

| Regions                    | DALYs (95%UI)              |                          |                          |                          |                       |                       |
|----------------------------|----------------------------|--------------------------|--------------------------|--------------------------|-----------------------|-----------------------|
|                            | 1990                       |                          | 2021                     |                          | 1990-2021             |                       |
|                            | Number                     | Rate (per100000)         | Number                   | Rate (per100000)         | Number change         | EAPC (95%CI)          |
| Andean Latin America       | 39585(30404 to 57056)      | 266.53(204.71 to 384.17) | 30317(19833 to 40288)    | 167.55(109.61 to 222.65) | -0.23(-0.58 to 0.17)  | -1.09(-1.28 to -0.9)  |
| Australasia                | 3391(3144 to 3669)         | 73.94(68.56 to 80.02)    | 1452(1246 to 1712)       | 25.34(21.74 to 29.88)    | -0.57(-0.64 to -0.49) | -3.27(-3.46 to -3.08) |
| Caribbean                  | 24101(15719 to 37827)      | 211.19(137.74 to 331.46) | 17381(10859 to 28649)    | 151.07(94.38 to 249.01)  | -0.28(-0.48 to -0.05) | -0.85(-1 to -0.69)    |
| Central Asia               | 42881(36501 to 50035)      | 171.59(146.06 to 200.21) | 23143(18736 to 29467)    | 83.62(67.7 to 106.47)    | -0.46(-0.58 to -0.3)  | -2.37(-2.54 to -2.2)  |
| Central Europe             | 32851(29689 to 36379)      | 111.42(100.7 to 123.39)  | 5750(5054 to 6486)       | 32.48(28.55 to 36.64)    | -0.82(-0.85 to -0.79) | -3.89(-4.09 to -3.7)  |
| Central Latin America      | 162906(152397 to 175209)   | 253.03(236.71 to 272.14) | 90648(76767 to 108162)   | 142.79(120.92 to 170.37) | -0.44(-0.54 to -0.32) | -1.36(-1.55 to -1.17) |
| Central Sub-Saharan Africa | 21094(9171 to 40995)       | 83.38(36.25 to 162.05)   | 28023(15432 to 42677)    | 47.75(26.3 to 72.73)     | 0.33(-0.23 to 2.19)   | -1.36(-1.56 to -1.16) |
| East Asia                  | 1409668(964759 to 1956190) | 427.39(292.5 to 593.08)  | 277916(162221 to 385772) | 103.95(60.68 to 144.29)  | -0.8(-0.89 to -0.68)  | -4.38(-4.56 to -4.19) |
| Eastern Europe             | 85680(78415 to 94164)      | 166.49(152.37 to 182.98) | 13624(12582 to 14913)    | 38.44(35.5 to 42.08)     | -0.84(-0.86 to -0.82) | -4.76(-5.04 to -4.48) |
| Eastern Sub-Saharan Africa | 178194(88537 to 311052)    | 196.75(97.75 to 343.44)  | 203405(126187 to 297789) | 114(70.72 to 166.89)     | 0.14(-0.39 to 1.42)   | -1.7(-1.79 to -1.62)  |

|                              |                          |                          |                          |                         |                       |                       |
|------------------------------|--------------------------|--------------------------|--------------------------|-------------------------|-----------------------|-----------------------|
| High-income Asia Pacific     | 35489(29968 to 40955)    | 100.82(85.14 to 116.35)  | 6457(5586 to 7227)       | 28.79(24.91 to 32.23)   | -0.82(-0.85 to -0.77) | -4.11(-4.38 to -3.85) |
| High-income North America    | 42204(41234 to 43342)    | 68.43(66.85 to 70.27)    | 17485(16225 to 18894)    | 26.65(24.73 to 28.79)   | -0.59(-0.61 to -0.55) | -2.82(-2.94 to -2.71) |
| North Africa and Middle East | 256141(165494 to 387633) | 182.33(117.8 to 275.92)  | 154064(86625 to 200537)  | 84.04(47.25 to 109.39)  | -0.4(-0.63 to -0.01)  | -2.07(-2.25 to -1.89) |
| Oceania                      | 1590(776 to 2936)        | 59.34(28.94 to 109.54)   | 2750(1421 to 5087)       | 54.13(27.97 to 100.12)  | 0.73(0.19 to 1.5)     | -0.22(-0.48 to 0.04)  |
| South Asia                   | 516282(297461 to 846735) | 119.13(68.64 to 195.39)  | 298964(216649 to 388634) | 58.96(42.73 to 76.65)   | -0.42(-0.63 to -0.01) | -2.19(-2.32 to -2.05) |
| Southeast Asia               | 304595(186006 to 494432) | 178.39(108.94 to 289.57) | 184265(125855 to 227514) | 106.73(72.89 to 131.78) | -0.4(-0.62 to -0.01)  | -1.44(-1.52 to -1.36) |
| Southern Latin America       | 20120(18578 to 21905)    | 134.79(124.46 to 146.75) | 10193(8912 to 11865)     | 70.32(61.48 to 81.85)   | -0.49(-0.57 to -0.4)  | -1.53(-1.71 to -1.35) |
| Southern Sub-Saharan Africa  | 12185(8674 to 17331)     | 58.89(41.92 to 83.77)    | 14691(10354 to 18766)    | 61.04(43.02 to 77.98)   | 0.21(-0.1 to 0.67)    | 0.27(0.05 to 0.49)    |
| Tropical Latin America       | 71852(63160 to 80317)    | 134.02(117.8 to 149.81)  | 36396(29706 to 43132)    | 72.51(59.18 to 85.93)   | -0.49(-0.59 to -0.39) | -1.22(-1.54 to -0.89) |
| Western Europe               | 59982(57898 to 61997)    | 84.46(81.53 to 87.3)     | 20950(19386 to 22940)    | 30.76(28.46 to 33.68)   | -0.65(-0.68 to -0.62) | -3.27(-3.39 to -3.15) |
| Western Sub-Saharan Africa   | 79916(39174 to 126937)   | 90.94(44.58 to 144.44)   | 148882(58497 to 213080)  | 69.32(27.24 to 99.22)   | 0.86(0.08 to 2.13)    | -0.55(-0.66 to -0.44) |

DALYs: disability-adjusted life year; EAPC: estimated annual percentage changes; CI: confidence interval; UI: uncertainty interval.
